# Supplementary material
Source: MDPI journal article supplement (https://www.mdpi.com/2227-9717/10/9/1748)
Supplement: s1 [file s1]

## SUPPORTING MATERIAL

### A. Reaction Order model and Pre-Exponential Factor model fitting for kinetic parameters determination

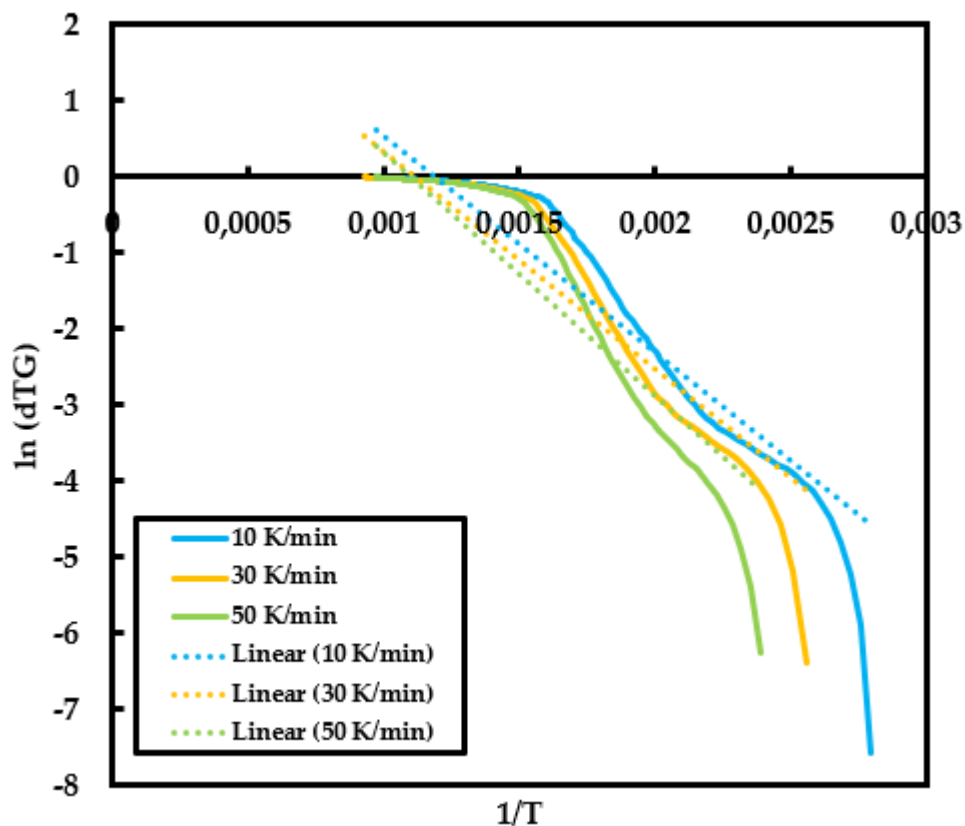

Figure S1. N-Reaction Order model fitting for EFB.

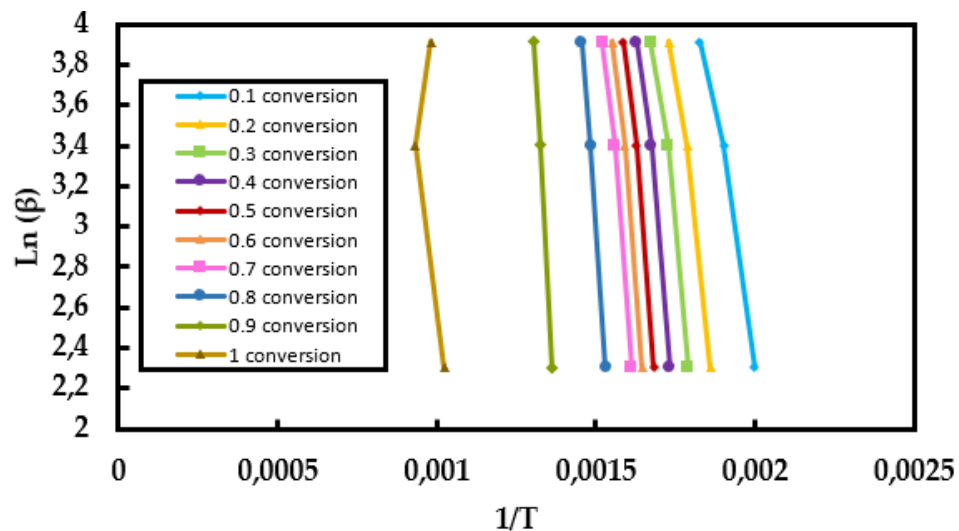

Figure S2. Pre-Exponential Factor model fitting for EFB.

## B. DAEM Model Fitting for EFB Samples Mixed with Zn

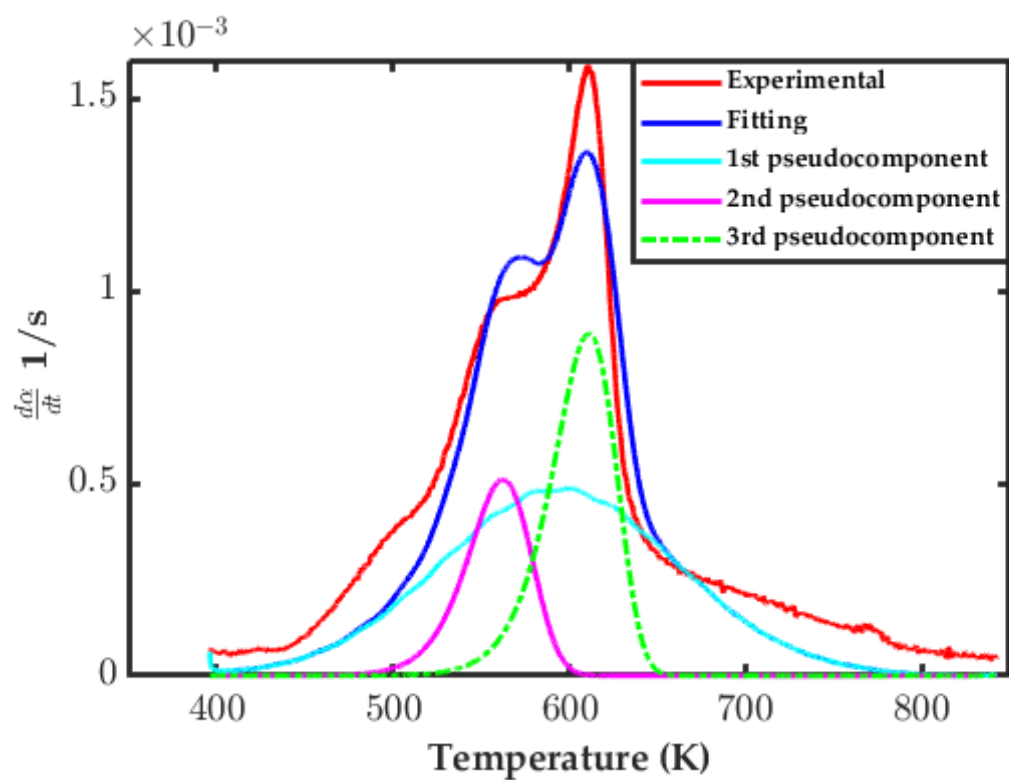

(a)

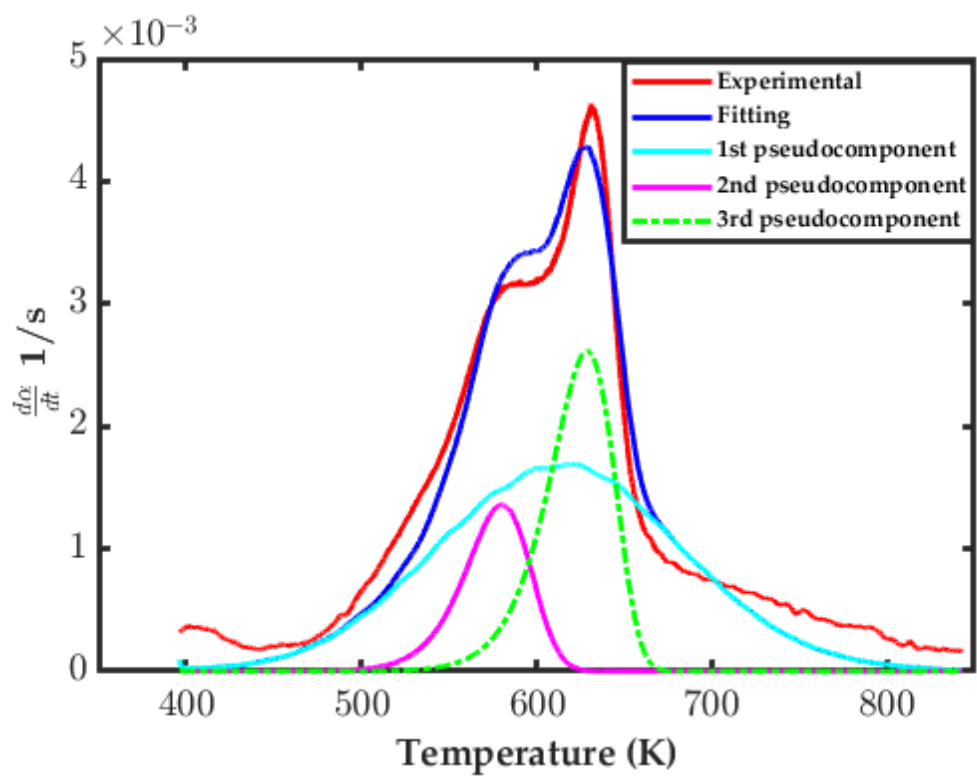

(b)

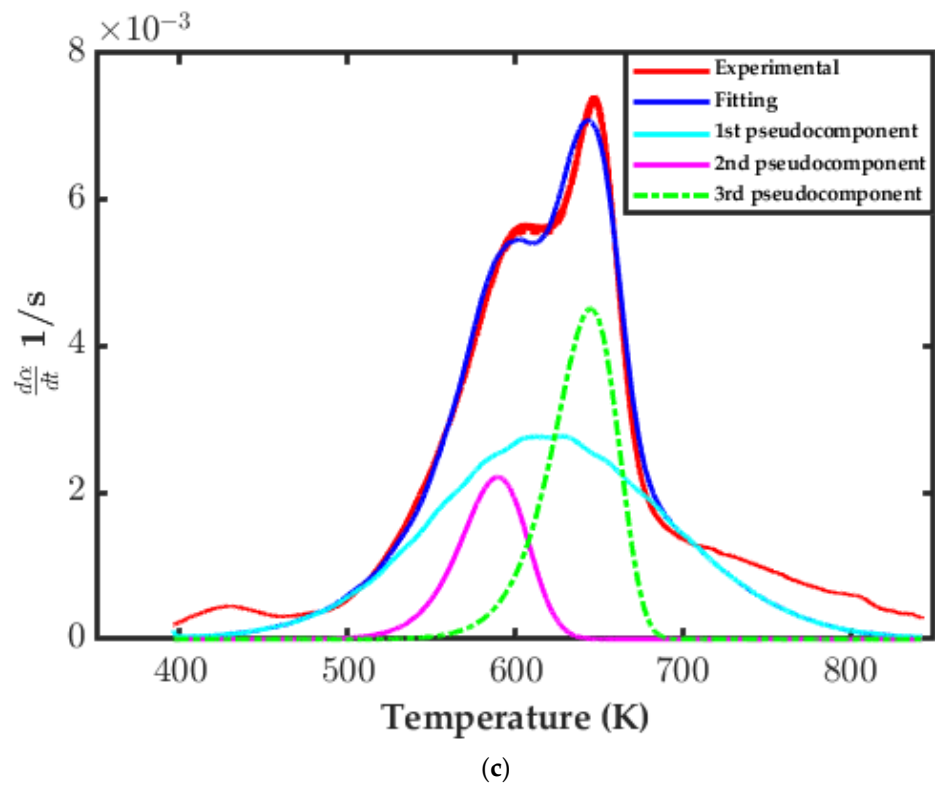

Figure S3. DAEM model fitting for: (a) EFB at 10 K/min; (b) EFB at 30 K/min; (c) EFB at 50 K/min.

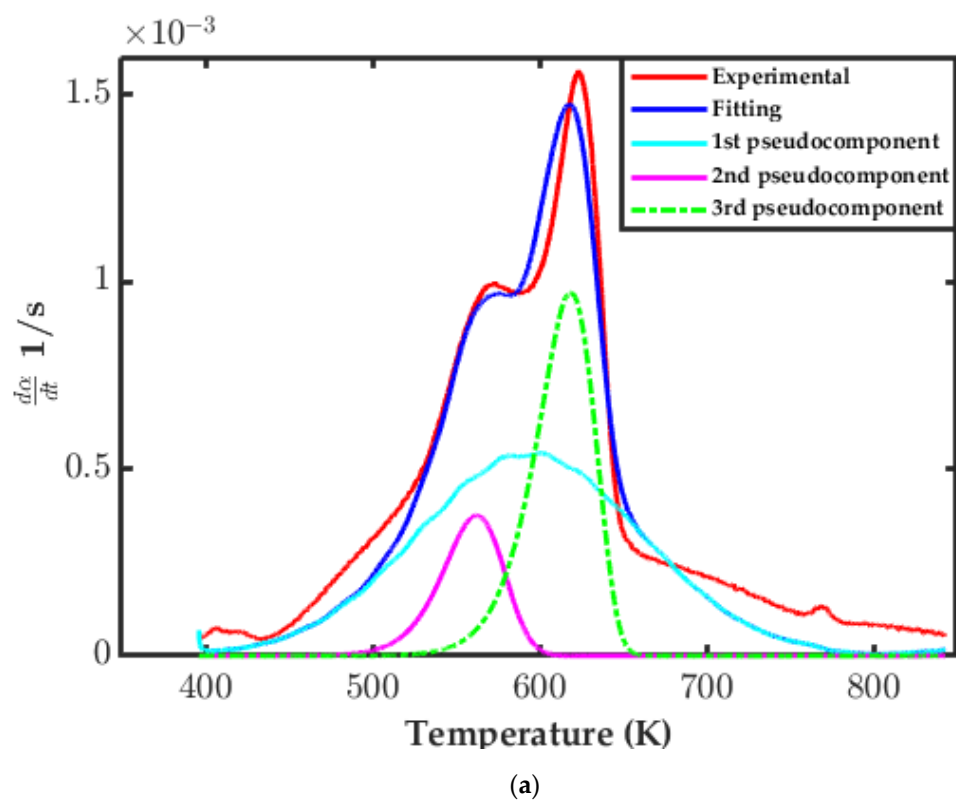

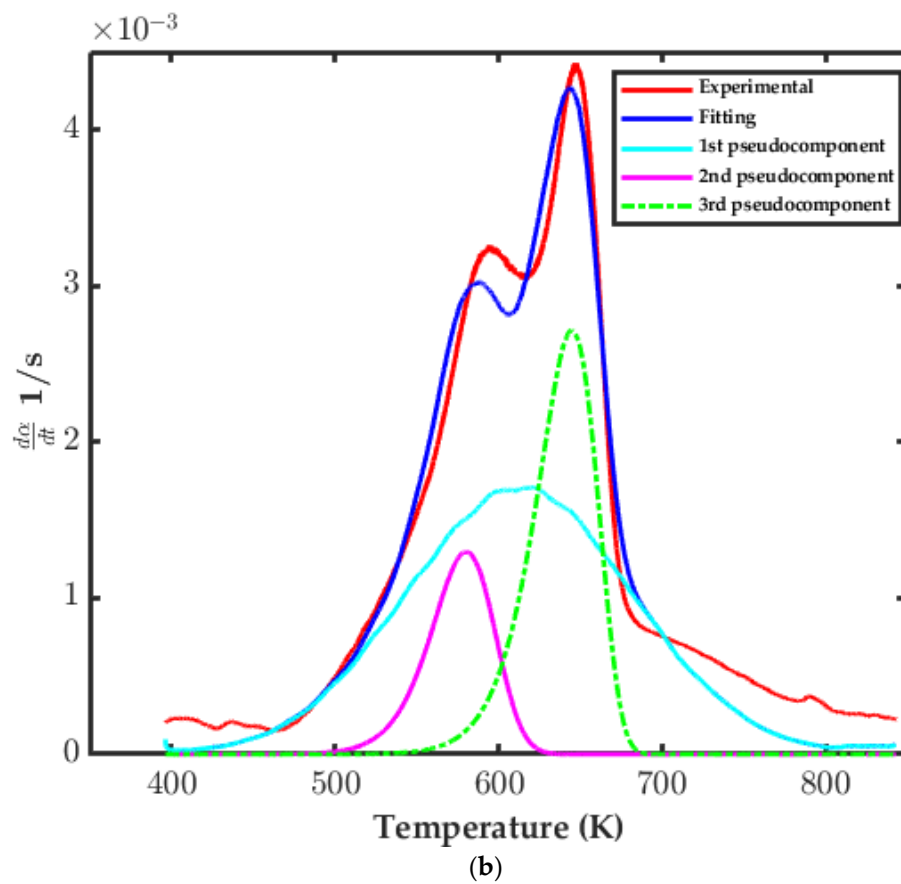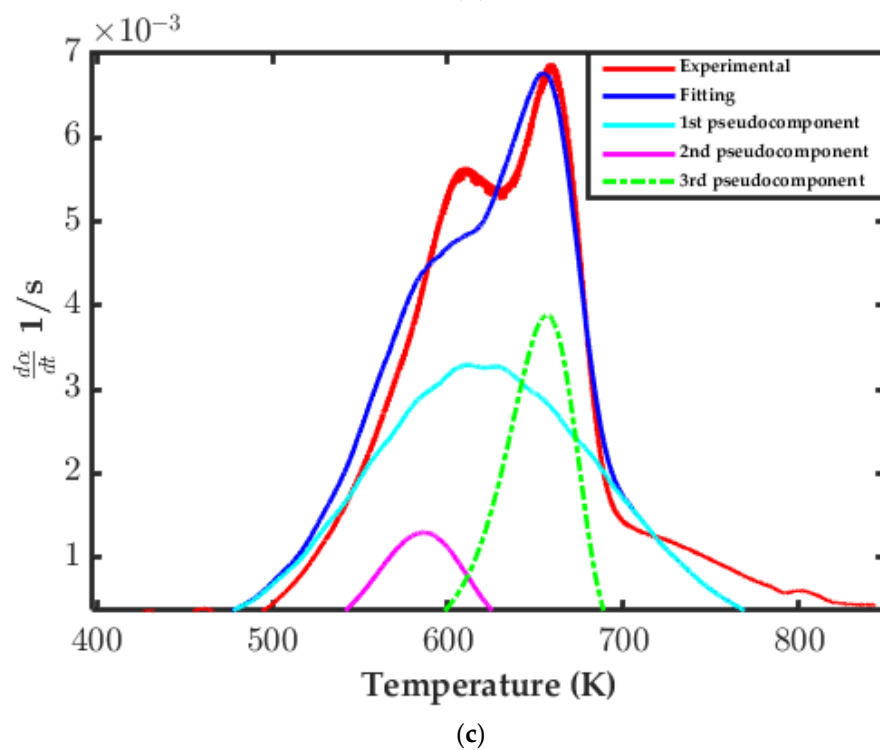

**Figure S4.** DAEM model fitting for: (a) EFB + 2% Zn at 10 K/min; (b) EFB + 2% Zn at 30 K/min; (c) EFB + 2% Zn at 50 K/min.

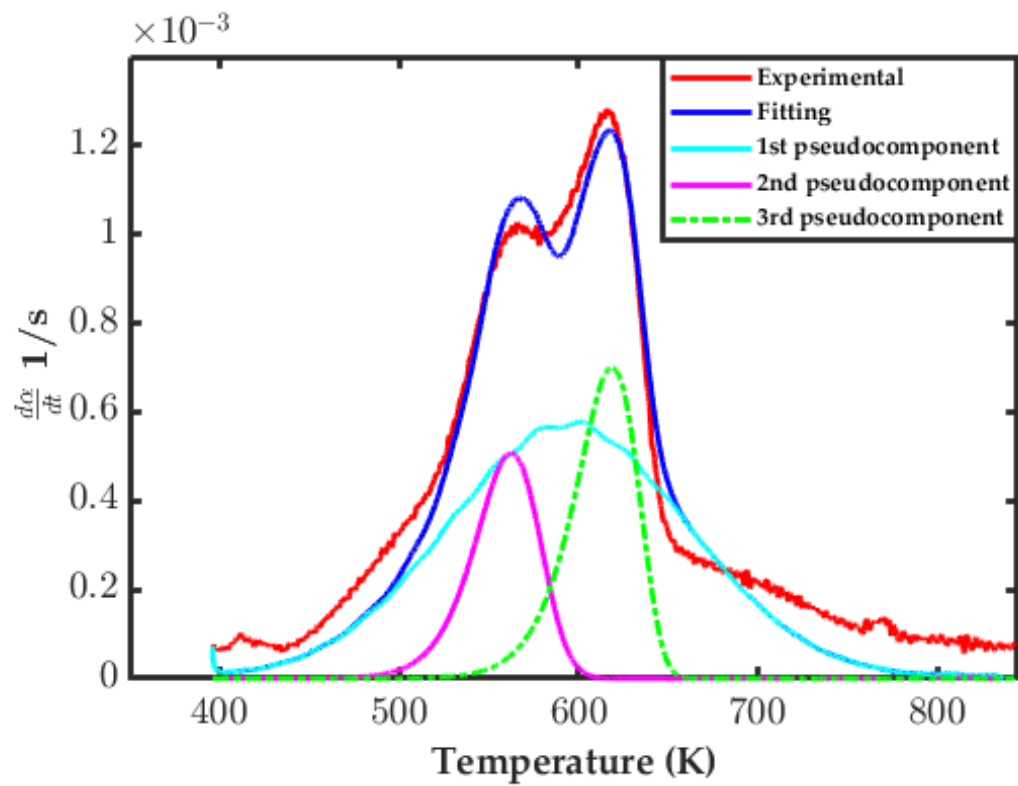

(a)

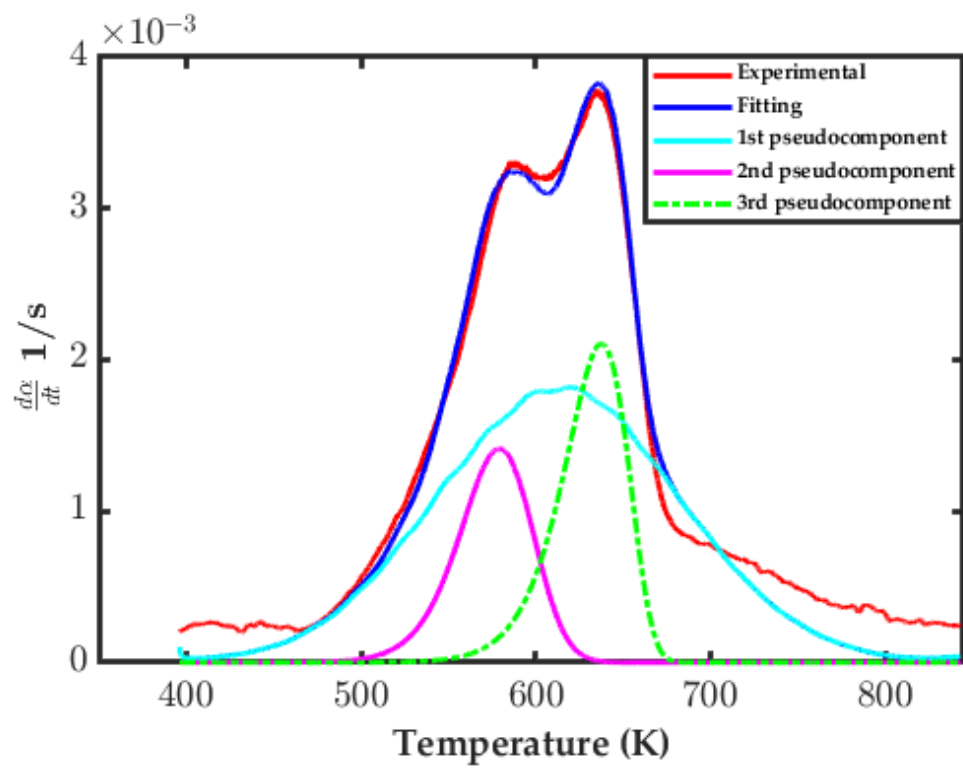

(b)

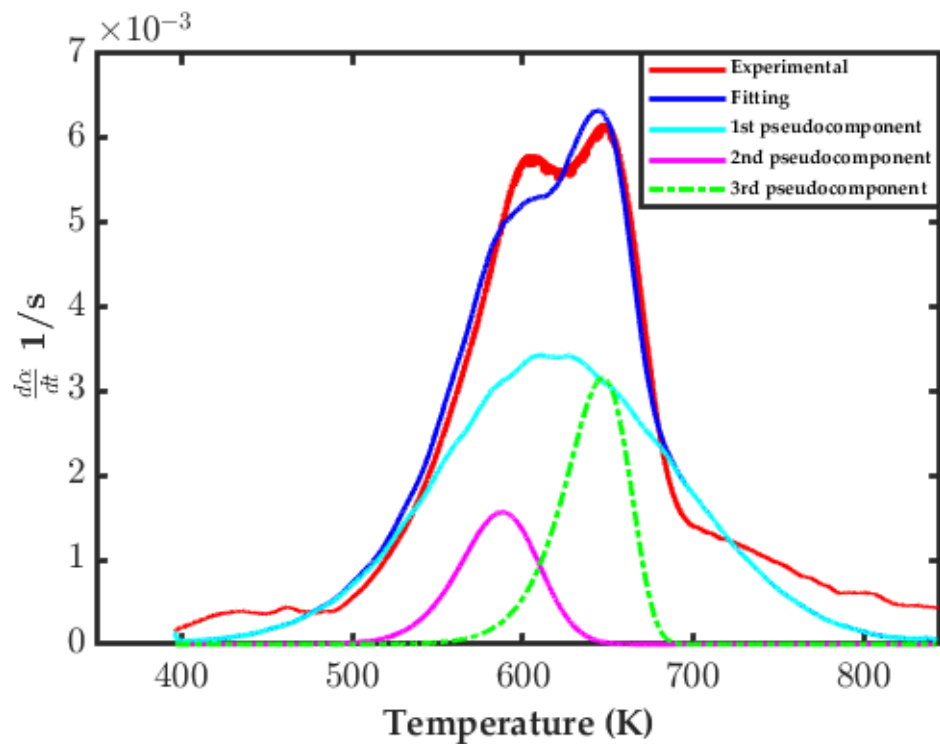

(c)

**Figure S5.** DAEM model fitting for: (a) EFB + 3% Zn at 10 K/min; (b) EFB + 3% Zn at 30 K/min; (c) EFB + 3% Zn at 50 K/min.

### C. FTIR Spectrum of EFB Samples Mixed with Zn

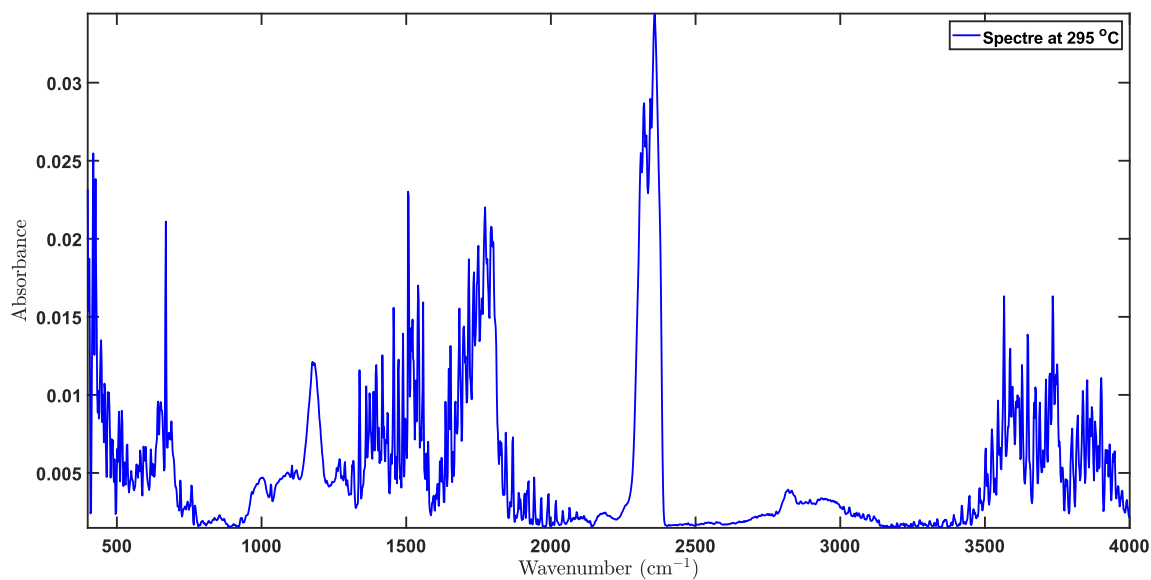

(a)

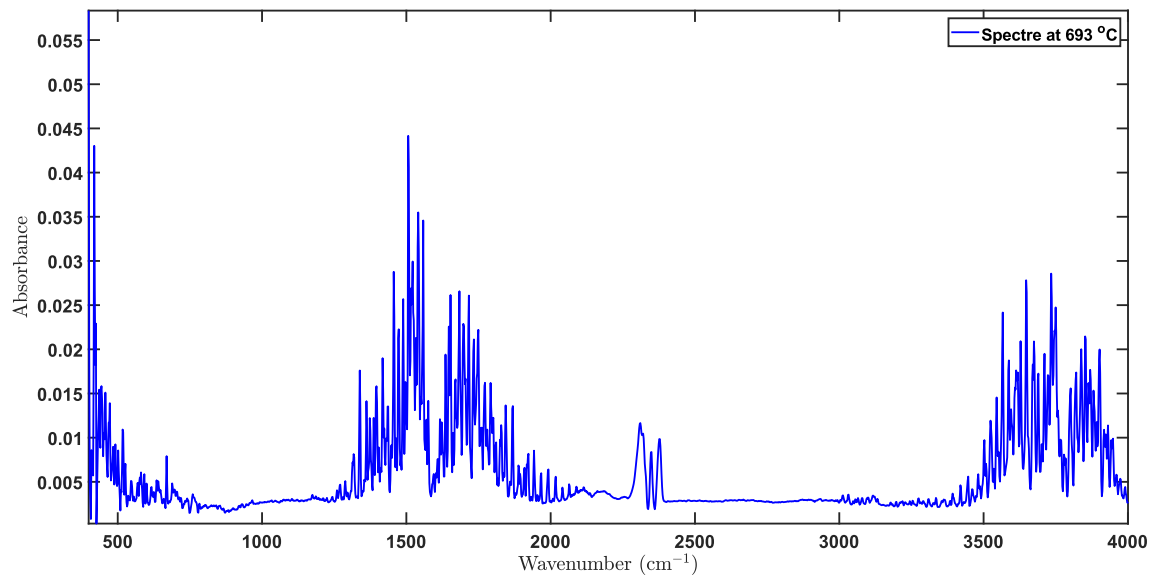

(b)

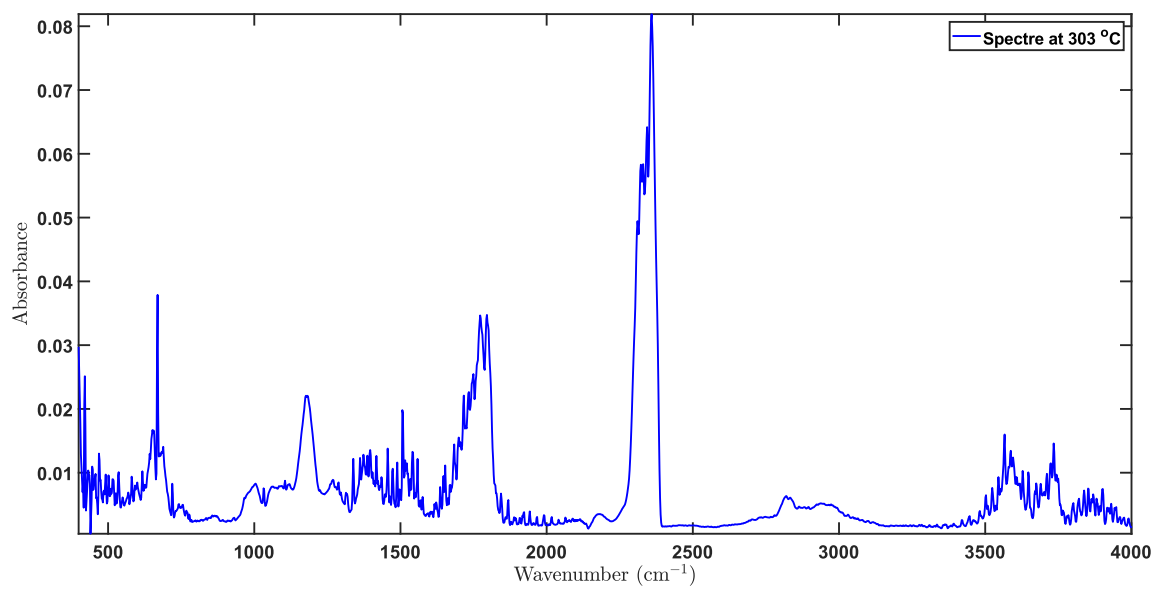

(c)

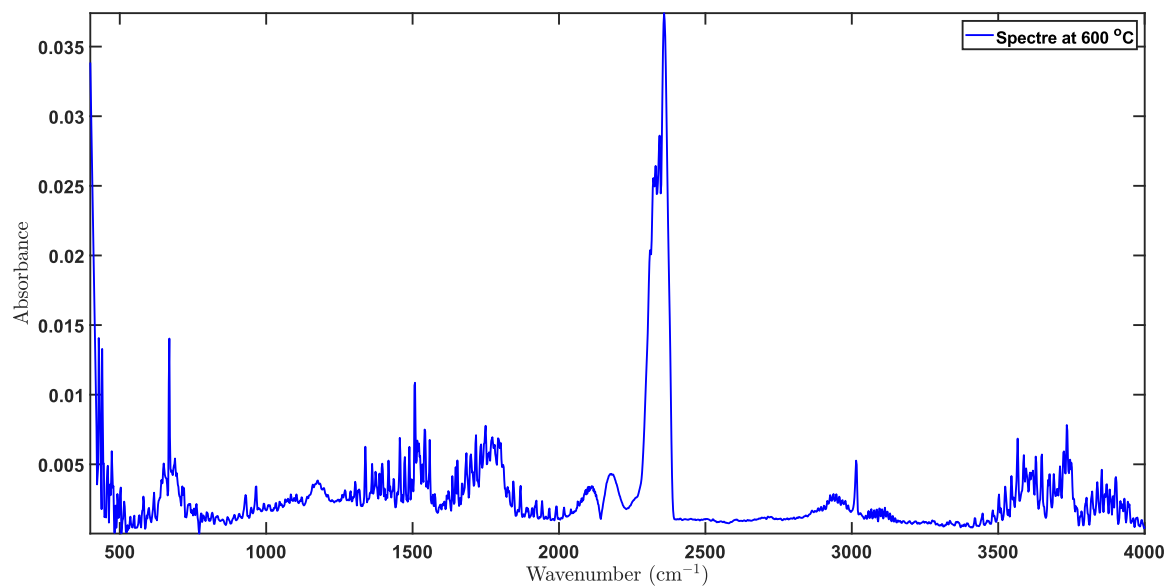

(d)

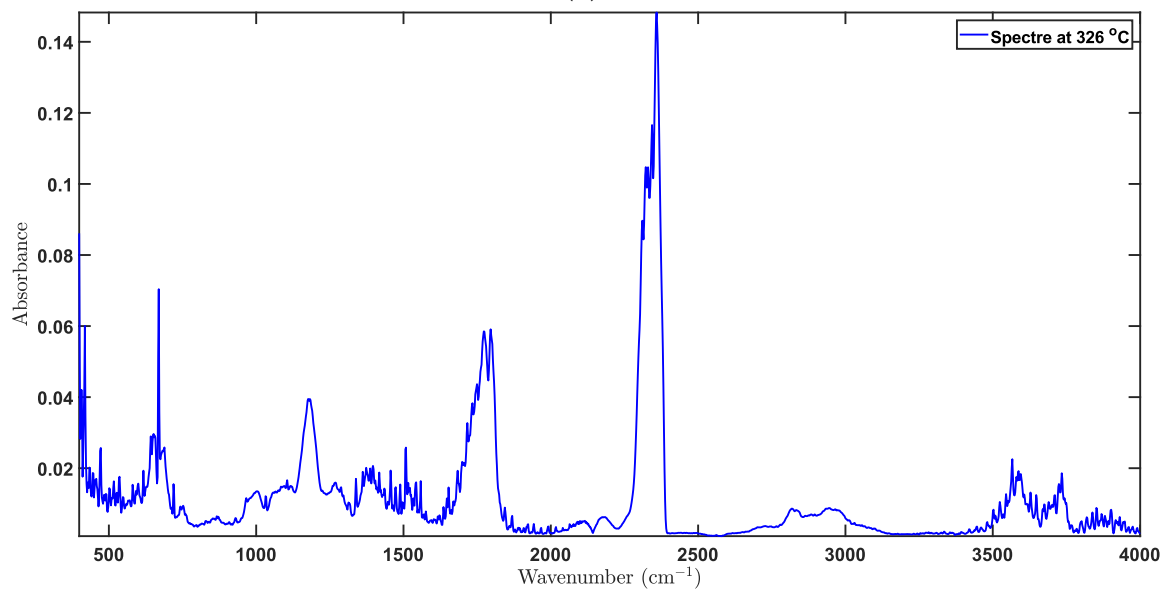

(e)



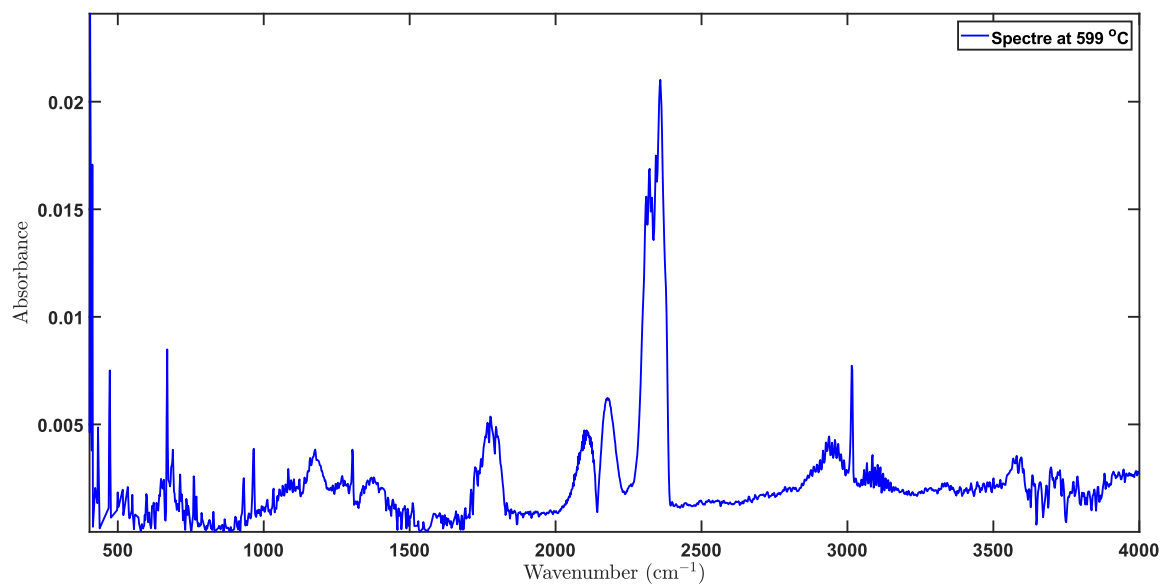

(f)

**Figure S6.** FTIR spectrum of EFB + 1% Zn sample: (a) 10 K/min at 95 °C, (b) 10 K/min at 693 °C, (c) 30 K/min at 303 °C, (d) 30 K/min at 600 °C, (e) 50 K/min at 326 °C, (f) 50 K/min at 599 °C.

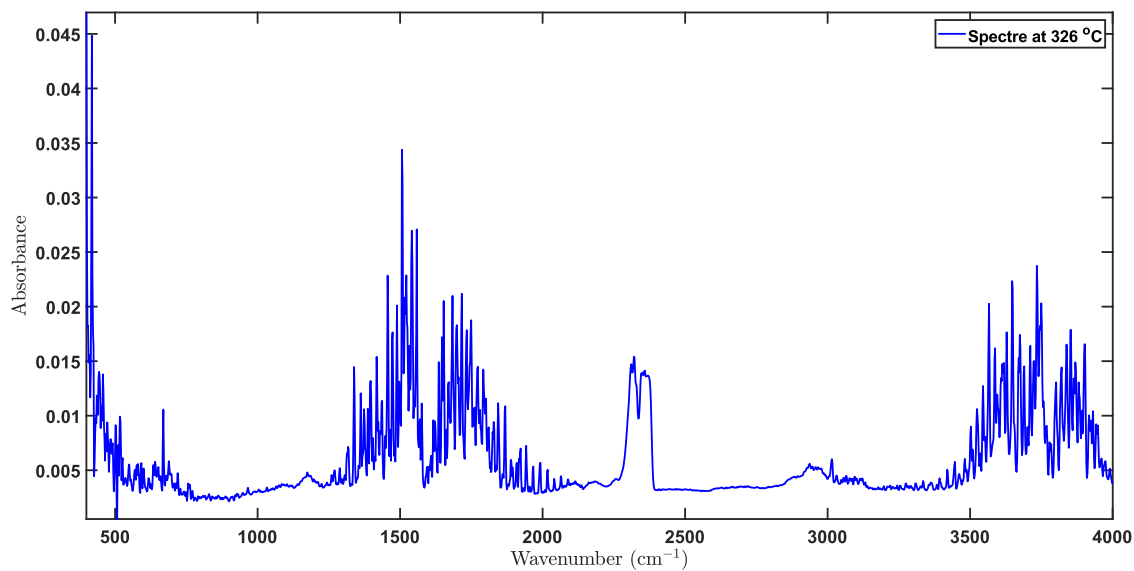

(a)

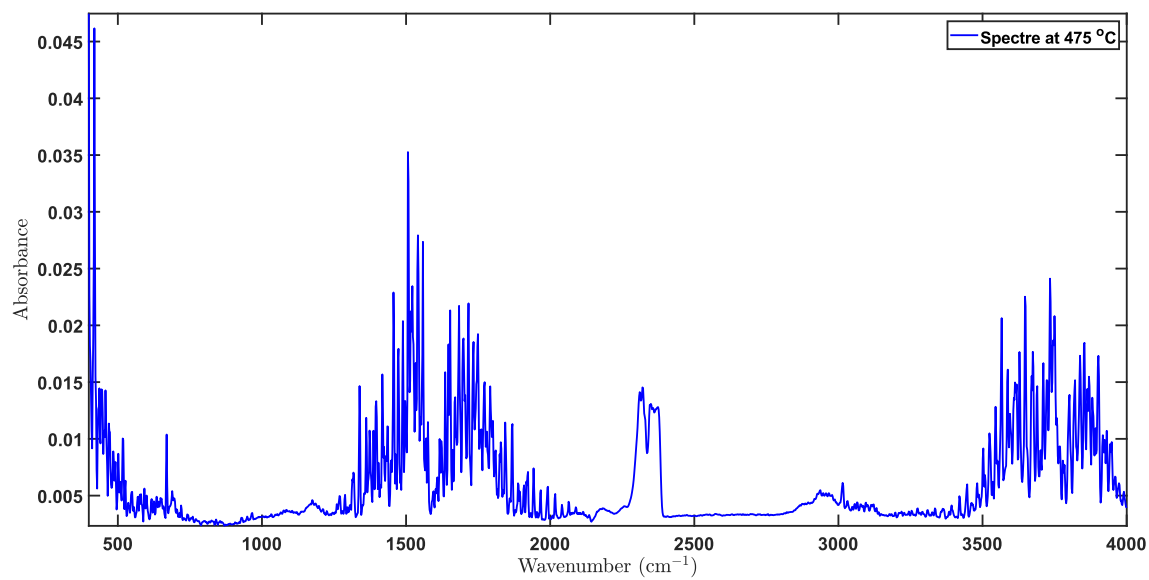

(b)

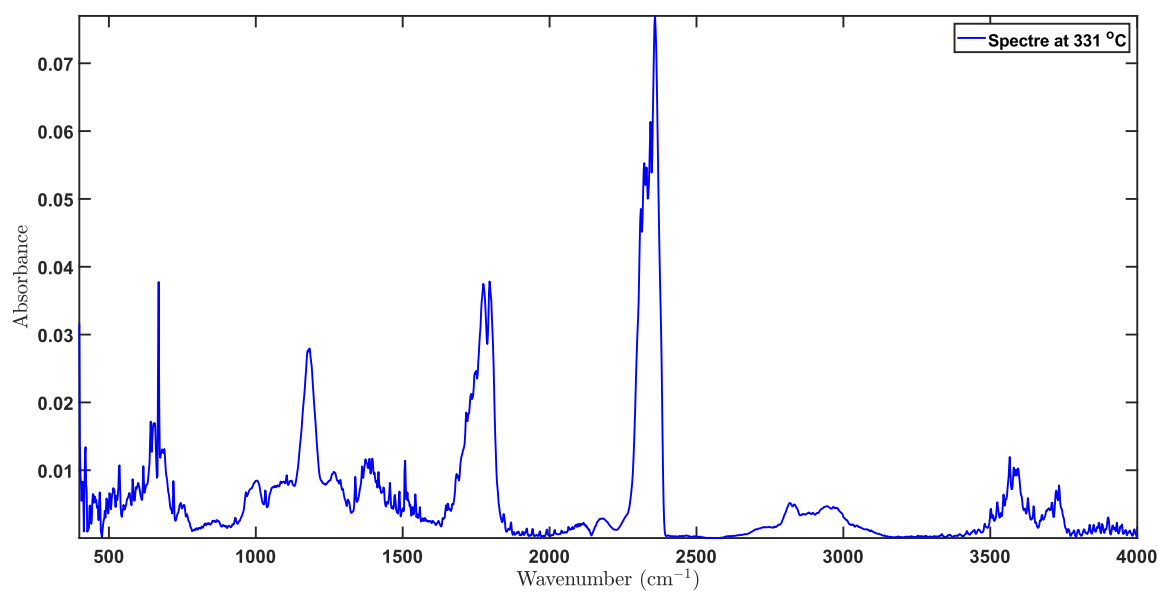

(c)

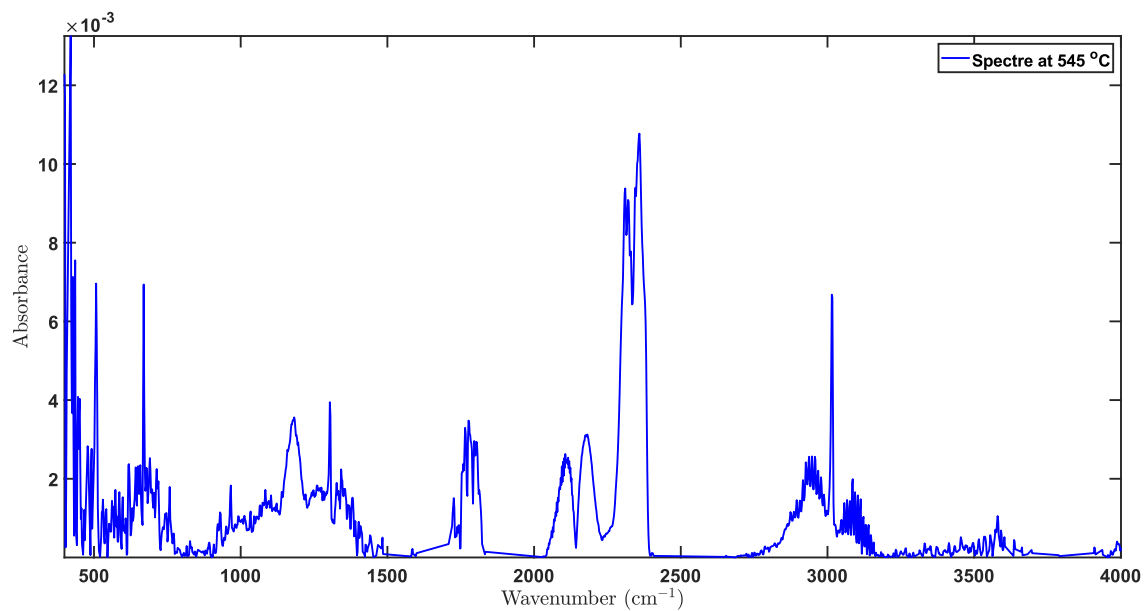

(d)

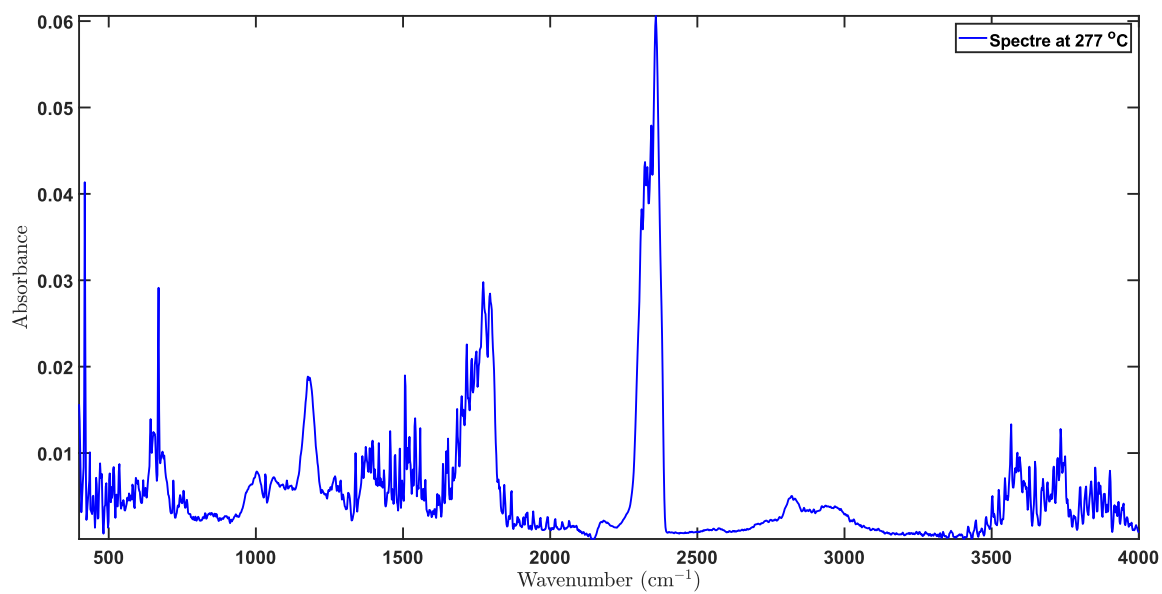

(e)

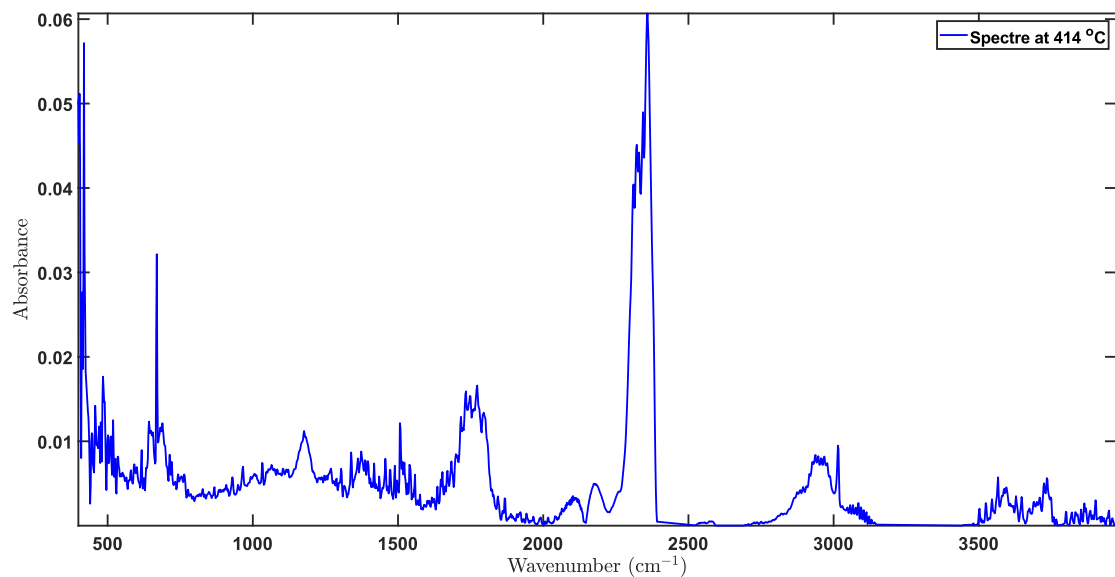

(f)

**Figure S7.** FTIR spectrum of EFB + 2% Zn sample: (a) 10 K/min at 326 °C, (b) 10 K/min at 475° C, (c) 30 K/min at 331 °C, (d) 30 K/min at 545 °C, (e) 50 K/min at 277 °C, (f) 50 K/min at 414 °C.

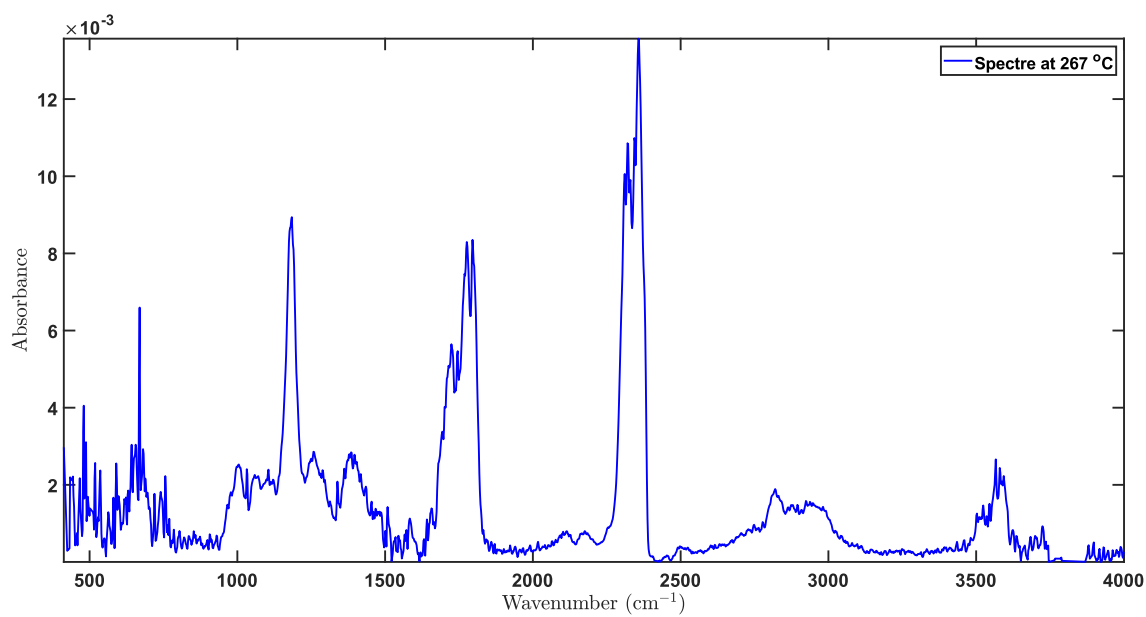

(a)

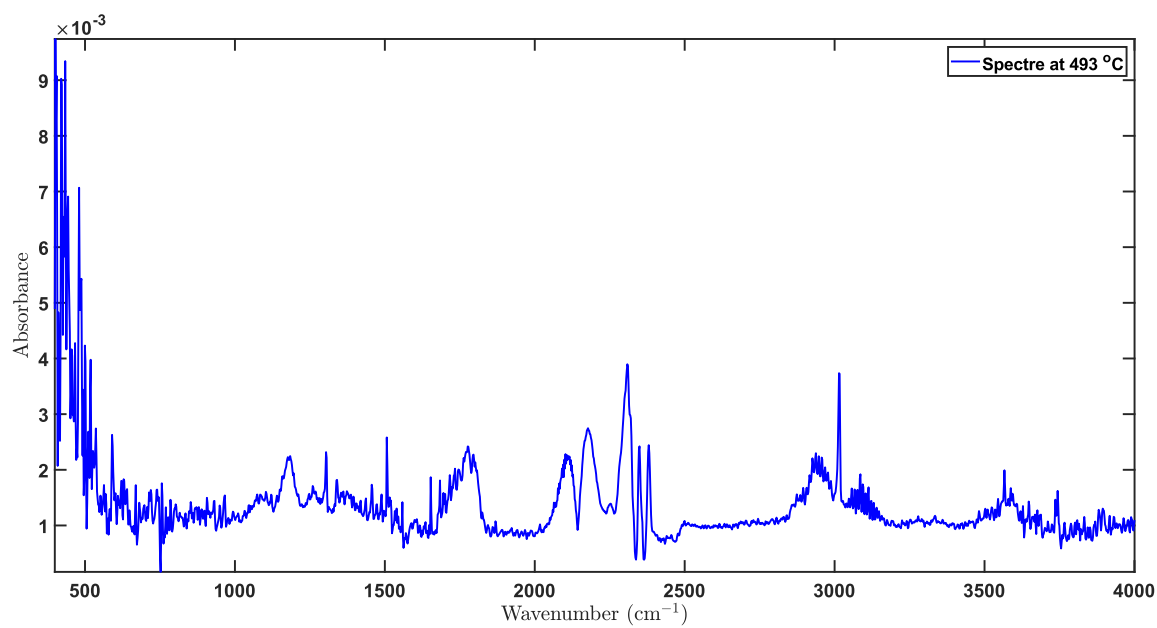

(b)

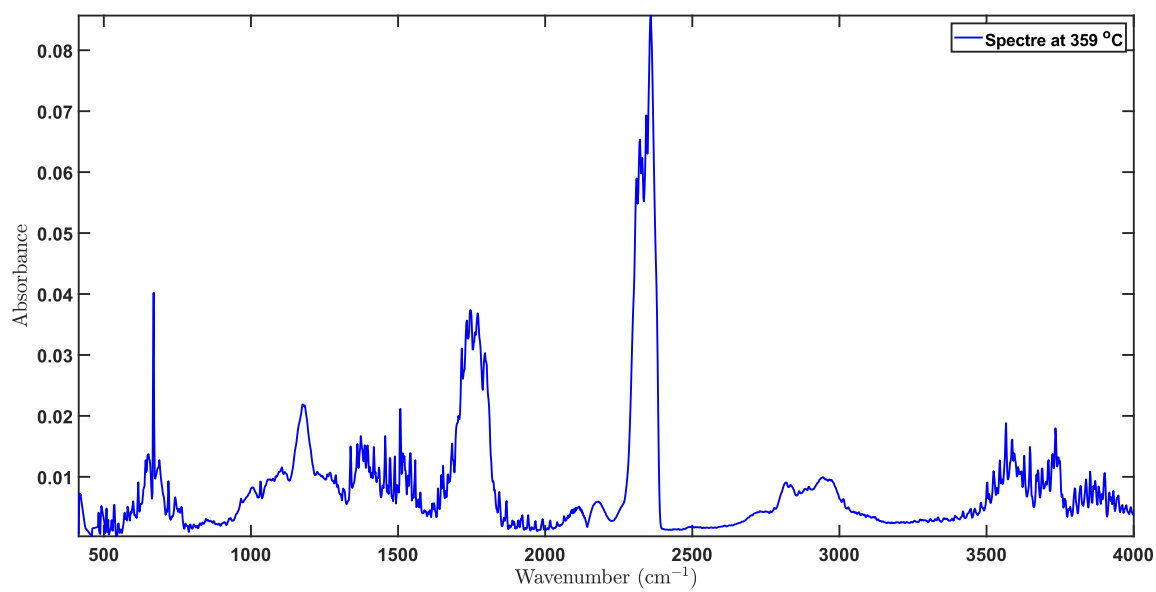

(c)

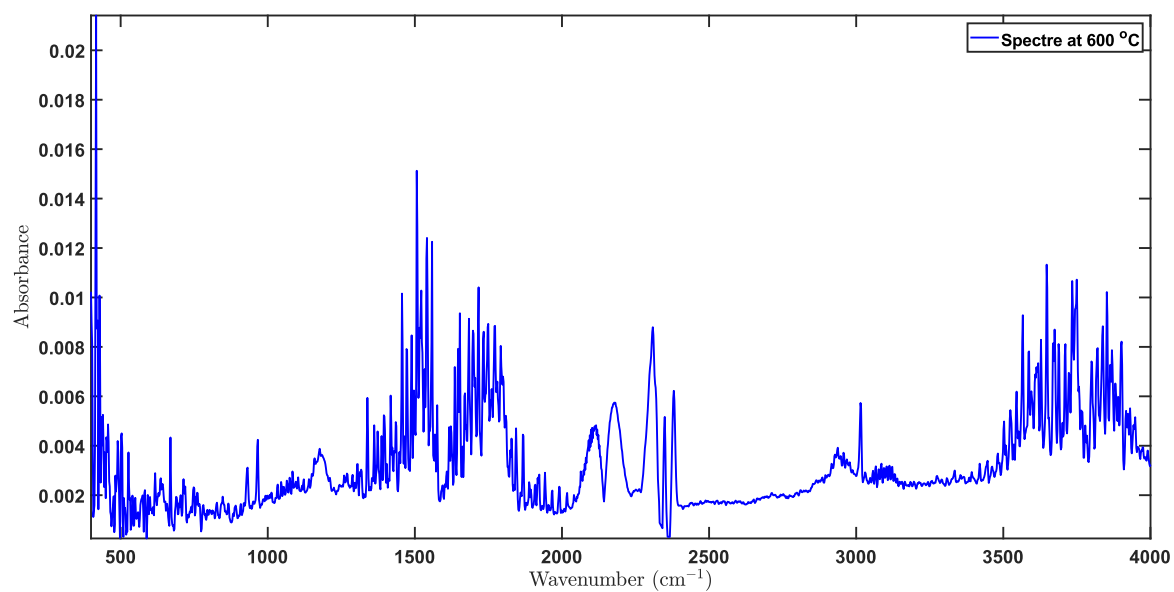

(d)

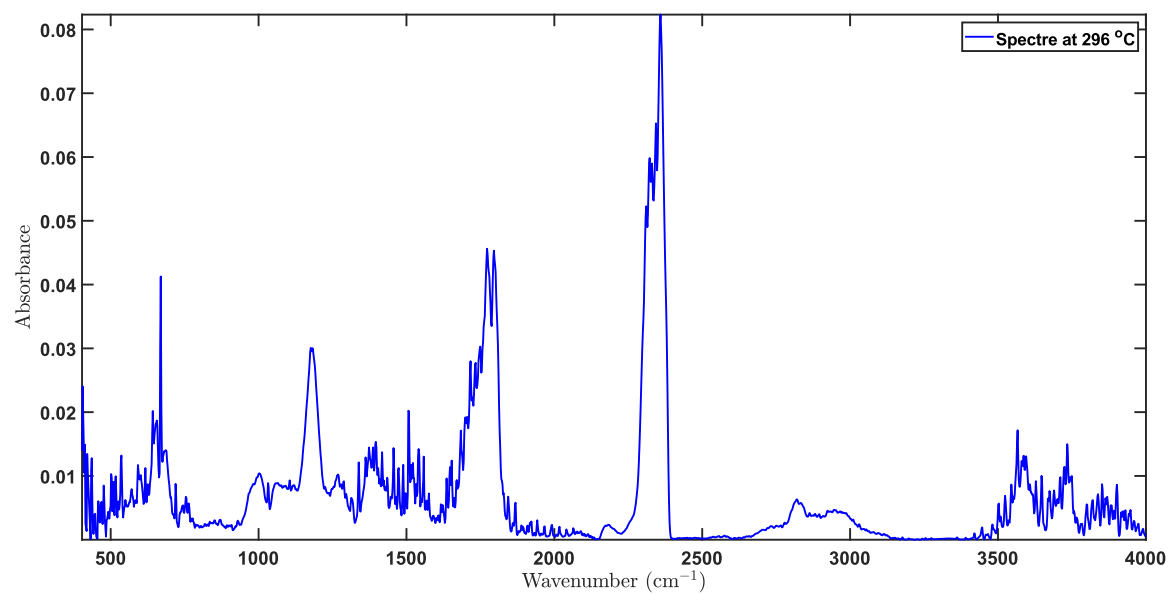

(e)

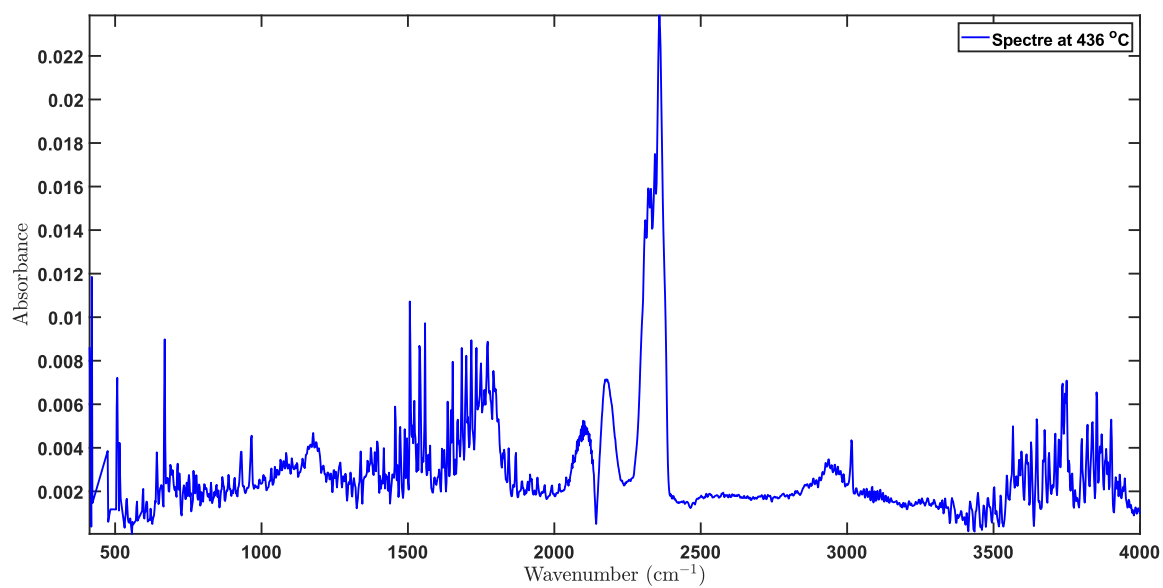

(f)

**Figure S8.** FTIR spectrum of EFB + 3% Zn sample: (a) 10 K/min at 267 °C, (b) 10 K/min at 493 °C, (c) 30 K/min at 359 °C, (d) 30 K/min at 600 °C, (e) 50 K/min at 296 °C, (f) 50 K/min at 436 °C.
